# Supplementary material for: A theoretical study of pure and mixed caesium clusters and cluster ions, CslHmO0/+n, l≤ 5: geometry, energetics and photofragmentation
Source: Royal Society of Chemistry journal article supplement (doi:10.1039/c1cp21274e), 2011-01-01
Supplement: c1cp21274e.pdf [file c1cp21274e.pdf]

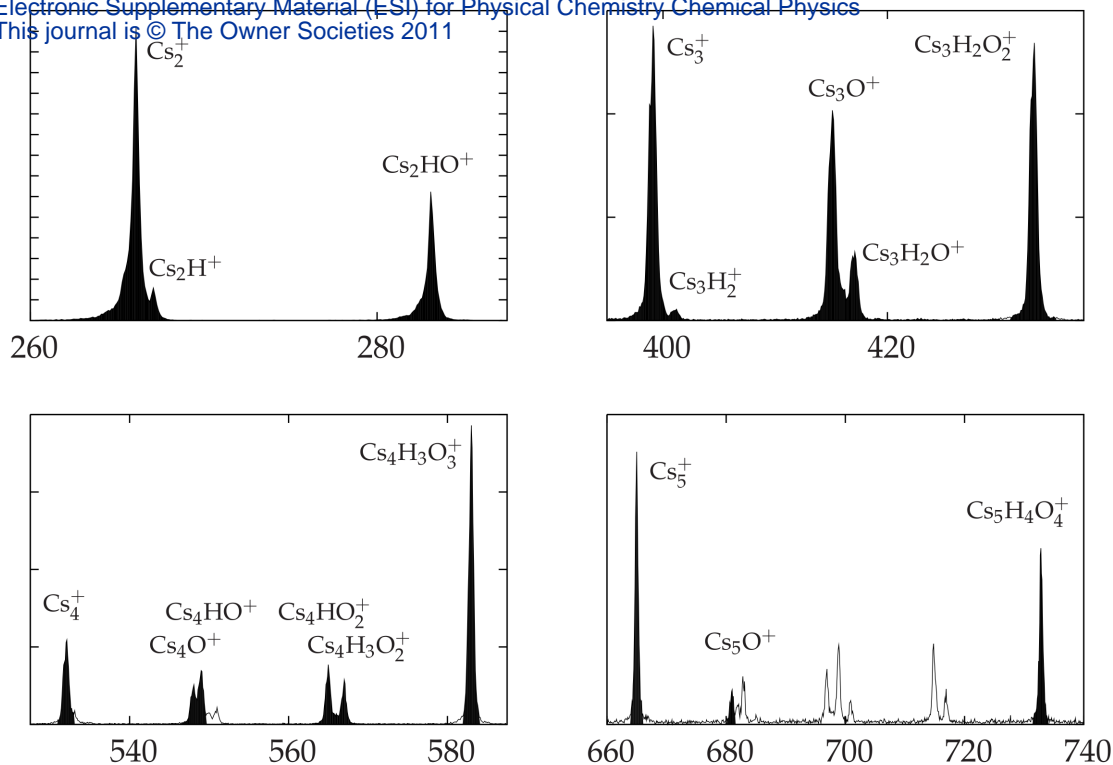

**Figure 1.2:** Photoionization mass spectrum of mixed  $\text{Cs}_k\text{H}_m\text{O}_n$  clusters in helium nanodroplets<sup>[4]</sup> (detailed views). Abscissa: Ion mass [amu]. Ordinate: Photoionization yield [arb. u.]. Axis ticks in all plots are equidistant. Filled and labelled peaks correspond to clusters calculated in this work.
